# Supplementary material
Source: PubMed Central journal article supplement (PMC2586586)
Supplement: 108.133116_1.pdf [file 108.133116_1.pdf]

## Supplementary Figure 1:

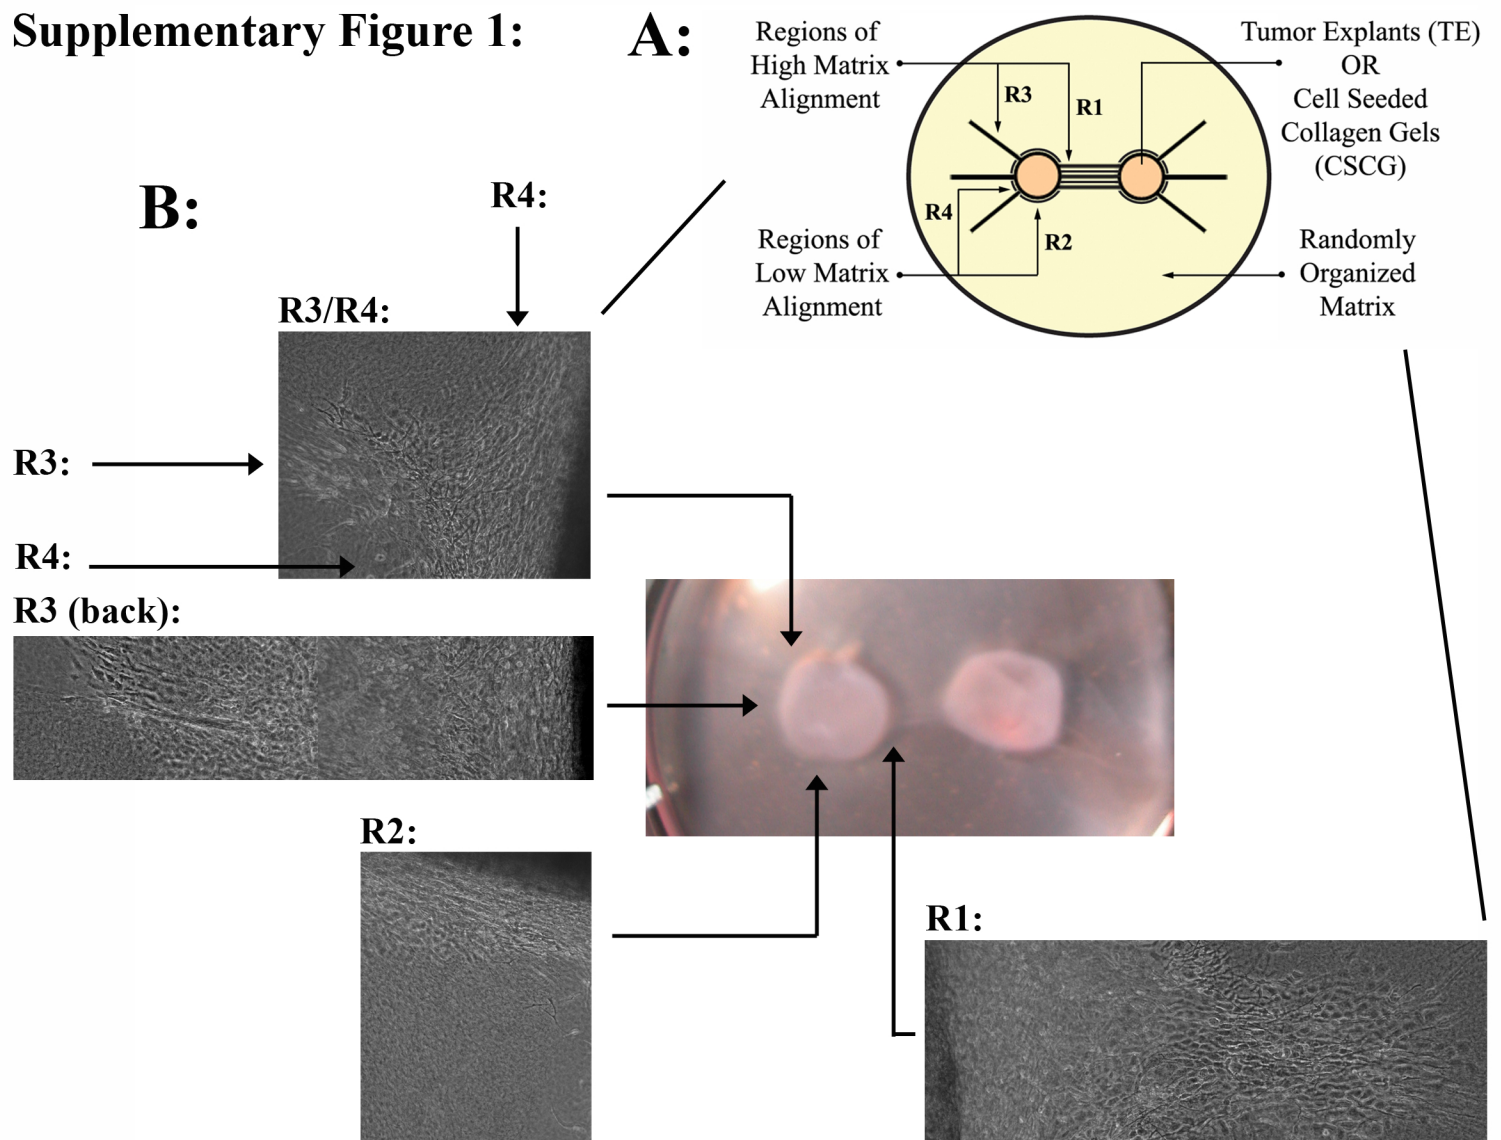

**Supplementary Figure 1:** (A) Diagram of the 3D Migration/Invasion assay used in this study illustrating the state of matrix re-organization by the cells in the explants. (B) Phase contrast microscopy of MDA-MB-231 cells at 10 days showing examples of 3D invasion within the aligned zone between the explants (R1) as well as the aligned control regions (R3). Note the substantial differences in invasion between the highly aligned regions (R1 and R3) and regions of low matrix alignment (R2 and R4). Importantly, due to force balance resistance to contraction, regions R3 (not between the TEs or CSCGs) also aligned radially and promote 3D cell migration, while adjacent regions that are not aligned (Regions R4) do not. This provides a valuable control to rule out the possibility that migration between the two explants is being driven by chemoattraction from one explant to another.
