# Supplementary material
Source: PubMed Central journal article supplement (PMC2586586)
Supplement: 108.133116_2.pdf [file 108.133116_2.pdf]

## Supplementary Figure 2:

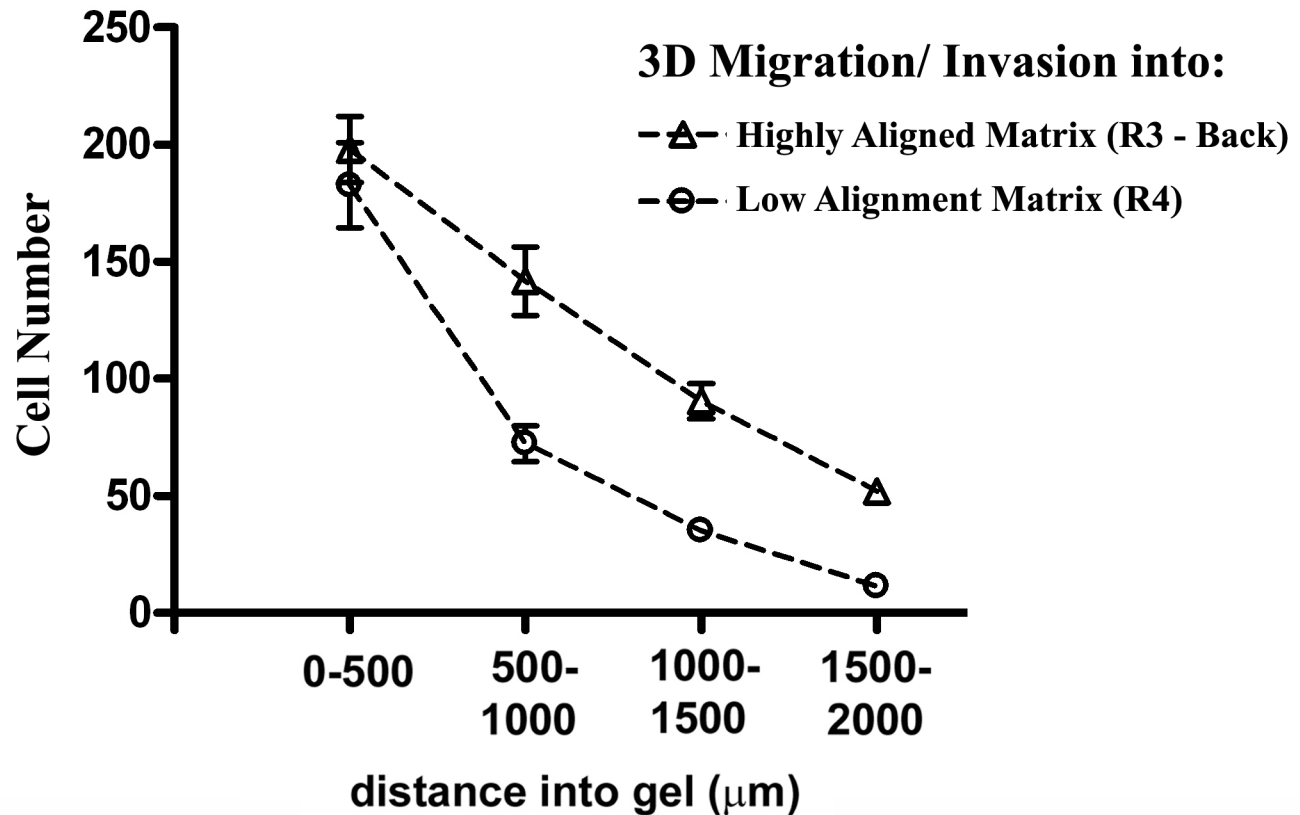

### Supplementary Figure 2: Control against chemoattraction driven 3D migration.

Quantification of the number of MDA-MB-231 cells invading a defined distance as a function of matrix alignment at day 14. Note that the distance spanning 0-500 microns includes outward growth of the CSCG while cells found beyond 500 microns are solely due to 3D migration. Note that migration into aligned regions is significantly ( $p < 0.001$ ) greater than migration into low-alignment regions for all distances  $\geq 500 \mu\text{m}$ , providing a valuable control against the possibility that migration between the two explants is solely being driven by chemoattraction from one explant to another
